# Supplementary material
Source: publisher figshare collection journal article supplement (https://gsajournals.figshare.com/ndownloader/files/22398501)
Supplement: Supplementary file 1 [file 22398501]

**Supplemental Information for Heraghty et al.: *De novo* genome assemblies for three North American bumble bee species: *Bombus bifarius*, *Bombus vancouverensis*, and *Bombus vosnesenskii***

**Table S1.** List of contaminants added to the default dataset from bbtools as well as the number of reads associated with each contaminant.

|  |  | No. Reads Mapped and Filtered (Illumina/ONT) | | |
| --- | --- | --- | --- | --- |
| Species Name | Genbank ID | *B. bifarius* | *B. vancouverensis* | *B. vosnesenskii* |
| *Bacteriophage lambda* | NC_001416.1 | 1/42120 | 2/46 | 2/13 |
| *Pseudomonas fluorescens* | NC_012660.1 | 14292/949 | 9025/1095 | 8027/590 |
| *Bacillus halodurans* | NC_002570.2 | 4392/644 | 3402/982 | 1831/670 |
| *Staphylococcus epidermidis* | NC_002976.3 | 8497/2594 | 6625/3416 | 8955/4333 |
| *Escherichia coli* | NC_000913.3 | 1185/303 | 993/575 | 3132/1469 |
| *Gilliamella apicola* | NZ_CP007445.1 | 19818/4582 | 16499/7937 | 73987/11942 |
| *Gluconobacter oxydans* | NC_006677.1 | 29342/3576 | 25536/3375 | 24502/1882 |
| *Neisseria meningitidis* | NC_003112.2 | 25333/7356 | 21936/5989 | 18473/3664 |
| *Candidatus Snodgrassella* | JQ966983.1 | 99/48 | 45/191 | 547/78 |
| *Parasaccharibacter apium* | NZ_CP020554.1 | 1454/457 | 1397/334 | 12606/1154 |
| *Snodgrassella alvi* | NZ_CP007446.1 | 5055/3908 | 4464/3214 | 90341/7521 |
| *Granulibacter bethesdensis* | NC_008343.2 | 1863/357 | 1748/551 | 2783/531 |
| *Arsenophonus nasoniae* | AUCC01000001.1- AUCC01000302.1 | 38924/27649 | 73214/13836 | 44652/20715 |
